# Supplementary material for: The effectiveness of large group demonstration training method on the use of pressurized metered-dose inhaler in elderly with chronic obstructive pulmonary disease
Source: PubMed Central journal article supplement — J Thorac Dis. 2022 Apr;14(4):919–26. doi: 10.21037/jtd-21-1612 (PMC9096321; doi:10.21037/jtd-21-1612), 2022-04
Supplement: jtd-14-04-919-dss.pdf [file jtd-14-04-919-dss.pdf]

## Data Sharing Statement

|                     |                                                                                                                                                    |                                                                                                          |
|---------------------|----------------------------------------------------------------------------------------------------------------------------------------------------|----------------------------------------------------------------------------------------------------------|
| <b>Article Info</b> | <a href="https://dx.doi.org/10.21037/jtd-21-1612">https://dx.doi.org/10.21037/jtd-21-1612</a>                                                      |                                                                                                          |
| <b>Item</b>         | <b>Question</b>                                                                                                                                    | <b>Authors' Response<br/>(place "-" if not applicable)</b>                                               |
| 1                   | Would you like to share data collected for your study to others?                                                                                   | Yes. We are willing to share data related to our article with others based on the data protection rules. |
| 2                   | If not, would you like to share the reason for your decision?                                                                                      | -                                                                                                        |
| 3                   | What data in particular will be shared?                                                                                                            | raw data/patient information                                                                             |
| 4                   | Any other documents will be share? Such as study protocol, statistical analysis plan, informed consent form, clinical study report, analytic code. | -                                                                                                        |
| 5                   | When will data availability begin?                                                                                                                 | By request                                                                                               |
| 6                   | When will data availability end?                                                                                                                   | NA.                                                                                                      |
| 7                   | To whom will you share the data?                                                                                                                   | To other research group                                                                                  |
| 8                   | For what type of analysis or purpose?                                                                                                              | Multicentric                                                                                             |
| 9                   | How or where can the data/documents be obtained?                                                                                                   | By request, according to the agreement between us and other research group                               |
| 10                  | Any other restrictions?                                                                                                                            | NA.                                                                                                      |
