# Supplementary material for: The effectiveness of large group demonstration training method on the use of pressurized metered-dose inhaler in elderly with chronic obstructive pulmonary disease
Source: PubMed Central journal article supplement — J Thorac Dis. 2022 Apr;14(4):919–26. doi: 10.21037/jtd-21-1612 (PMC9096321; doi:10.21037/jtd-21-1612), 2022-04
Supplement: jtd-14-04-919-supplementary.pdf [file jtd-14-04-919-supplementary.pdf]

**Table S1** The essential steps checklist for inhaler devices

| Essential steps                                           | pMDI                        | pMDI with spacer            |
|-----------------------------------------------------------|-----------------------------|-----------------------------|
| Shake inhaler thoroughly                                  | 1. <input type="checkbox"/> | 1. <input type="checkbox"/> |
| Remove the cap and keep inhaler in upright position       | 2. <input type="checkbox"/> | na                          |
| Remove cap and insert inhaler correctly into spacer       | na                          | 2. <input type="checkbox"/> |
| Breathe out gently to residual volume                     | 3. <input type="checkbox"/> | 3. <input type="checkbox"/> |
| Close lips on inhaler or spacer mouthpiece                | 4. <input type="checkbox"/> | 4. <input type="checkbox"/> |
| Press the canister at beginning of inhalation             | 5. <input type="checkbox"/> | na                          |
| Hold spacer level and press down firmly on canister once  | na                          | 5. <input type="checkbox"/> |
| Inhale slowly and deeply                                  | 6. <input type="checkbox"/> | 6. <input type="checkbox"/> |
| Hold breath for at least 10 seconds                       | 7. <input type="checkbox"/> | 7. <input type="checkbox"/> |
| Breath in and out through mouthpiece at least three times | na                          | 8. <input type="checkbox"/> |
| Patients performing incorrect inhalation techniques       | <input type="checkbox"/>    | <input type="checkbox"/>    |
| Patients performing incorrect flow (<30 or >60 L/min)     | <input type="checkbox"/>    | <input type="checkbox"/>    |
| Overall (incorrect technique and flow)                    | <input type="checkbox"/>    | <input type="checkbox"/>    |

pMDI, pressurized meter dose inhaler; na, not applicable to the device.
